# Supplementary material for: The Translation of Mobile-Exoneuromusculoskeleton-Assisted Wrist–Hand Poststroke Telerehabilitation from Laboratory to Clinical Service
Source: MDPI journal article supplement (doi:10.3390/bioengineering10080976), 2023-08-18
Supplement: s1 [file s1]

**Table S1.** Usefulness, Satisfaction and Ease of Use (USE) Questionnaire. Scores on seven-point Likert scales (1 “strongly disagree” to 7 “strongly agree”)

|                                                                               |
|-------------------------------------------------------------------------------|
| <b>Usefulness</b>                                                             |
| It helps me be more effective                                                 |
| It helps me be more productive                                                |
| It is useful                                                                  |
| It gives me more control over my (therapeutic) activities                     |
| It makes the things I want to accomplish easier to get done                   |
| It saves me time when I use it                                                |
| It meets my needs                                                             |
| It does everything I would expect it to do                                    |
| <b>Ease of Use</b>                                                            |
| It is easy to use                                                             |
| It is simple to use                                                           |
| It is user friendly                                                           |
| It requires the fewest steps possible to accomplish what I want to do with it |
| It is flexible                                                                |
| Using it is effortless                                                        |
| I can use it without written instructions                                     |
| I don't notice any inconsistencies as I use it                                |
| Both occasional and regular users would like it                               |
| I can recover from mistakes quickly and easily                                |
| I can use it successfully every time                                          |
| <b>Ease of Learning</b>                                                       |
| I learned to use it quickly                                                   |
| I easily remember how to use it                                               |
| It is easy to learn to use it                                                 |
| I quickly became skillful with it                                             |
| <b>Satisfaction</b>                                                           |
| I am satisfied with it                                                        |
| I would recommend it to a colleague                                           |
| It is fun to use                                                              |
| It works the way I want it to work                                            |
| It is wonderful                                                               |
| I feel I need to have it                                                      |
| It is pleasant to use                                                         |

**Table S2.** Customized Intrinsic Motivation Inventory (IMI) used in the study. Scores on seven-point Likert scales (1 “not at all true” to 7 “very true”). For an item with an (R) shown after, subtracted the item response from 8, and used the resulting number as the item score.

|                                                                                                 |
|-------------------------------------------------------------------------------------------------|
| <b>Interest/Enjoyment</b>                                                                       |
| I enjoyed doing this activity very much.                                                        |
| I thought this was a boring activity. (R)                                                       |
| This activity did not hold my attention at all. (R)                                             |
| I thought this activity was quite enjoyable.                                                    |
| <b>Perceived Competence</b>                                                                     |
| I think I am pretty good at this activity.                                                      |
| I am satisfied with my performance at this task.                                                |
| I was pretty skilled at this activity.                                                          |
| This was an activity that I couldn't do very well. (R)                                          |
| <b>Effort/Importance</b>                                                                        |
| I put a lot of effort into this.                                                                |
| I didn't try very hard to do well at this activity. (R)                                         |
| It was important to me to do well at this task.                                                 |
| I didn't put much energy into this. (R)                                                         |
| <b>Pressure/Tension</b>                                                                         |
| I felt very tense while doing this activity.                                                    |
| I was very relaxed in doing these. (R)                                                          |
| I was anxious while working on this task.                                                       |
| I felt pressured while doing these.                                                             |
| <b>Perceived Choice</b>                                                                         |
| I felt like it was not my own choice to do this task. (R)                                       |
| I felt like I had to do this. (R)                                                               |
| I did this activity because I had no choice. (R)                                                |
| I did this activity because I wanted to.                                                        |
| <b>Value/Usefulness</b>                                                                         |
| I believe this activity could be of some value to me.                                           |
| I would be willing to do this again because it has some value to me.                            |
| I think doing this activity could help me to improve motor function of the affected upper limb. |
| I think this is an important activity.                                                          |
| <b>Relatedness</b>                                                                              |
| I felt really distant to this person. (R)                                                       |
| I felt like I could really trust this person.                                                   |
| I'd like a chance to interact with this person more often.                                      |
| It is likely that this person and I could become friends if we interacted a lot.                |
